# Supplementary material for: p-Synephrine enantiomers: binary phase diagram, crystal structure and kinetic stability of a metastable conglomerate monitored by nonlinear optics
Source: Royal Society of Chemistry journal article supplement (doi:10.1039/d0ce00841a), 2020-01-01
Supplement: d0ce00841a1.pdf [file d0ce00841a1.pdf]

**Electronic Supplementary Information**

**p-Syneprine Enantiomers: Binary Phase Diagram, Crystal Structure and Kinetic Stability of Metastable Conglomerate Monitored by Nonlinear Optic**

Veronica Ianno',<sup>a</sup> Simon Clevers,<sup>b</sup> Philippe Négrier,<sup>c</sup> Valérie Dupray,<sup>b</sup> Gérard Coquerel,<sup>b</sup> Philippe Espeau,<sup>a</sup>

<sup>a</sup> Chemical and Biological Technologies for Health (UTCBS), CNRS UMR8258, INSERM U1022, Paris Descartes University, Sorbonne-Paris-Cité, Chimie ParisTech, PSL Research University, School of Pharmacy, 4 avenue de l'Observatoire, 75006 Paris, France.

<sup>b</sup> Laboratoire Ondes et Matière d'Aquitaine, Université de Bordeaux, UMR CNRS 5798, 351 cours de la Libération, 33405 Talence Cedex, France.

<sup>c</sup> SMS Laboratory EA 3233, University of Rouen Normandie, 76821 Mont Saint Aignan, France

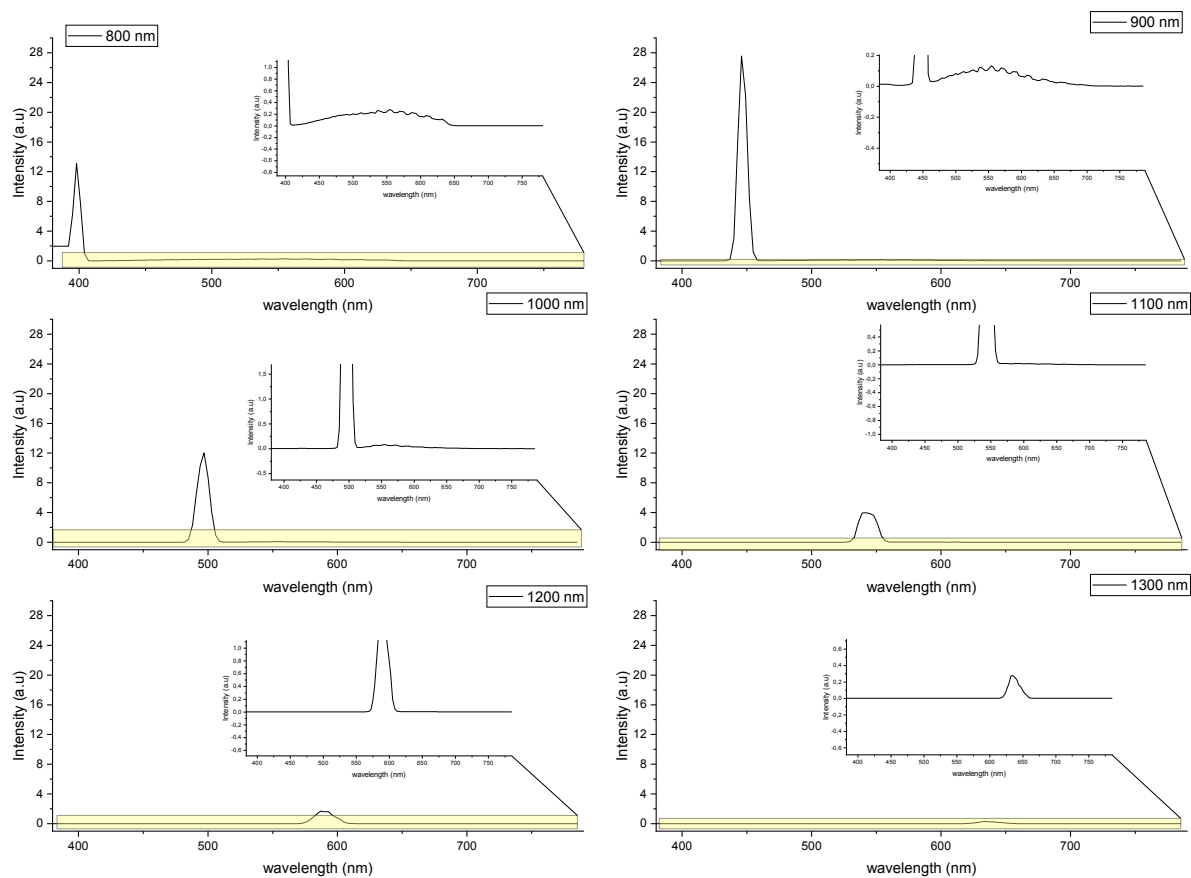

**Fig. S1.** Emission spectra of racemic physical mixture of synephrine at excitation wavelength of 800 nm, 900 nm, 1000nm, 1100 nm, 1200nm and 1300 nm. Peaks at the half of the excitation wavelength correspond to the second harmonic generation.
